# Supplementary material for: How Can Biological and Chemical Silver Nanoparticles Positively Impact Physio-Chemical and Chloroplast Ultrastructural Characteristics of Vicia faba Seedlings?
Source: MDPI journal article supplement (doi:10.3390/plants12132509), 2023-06-30
Supplement: s1 [file s1]

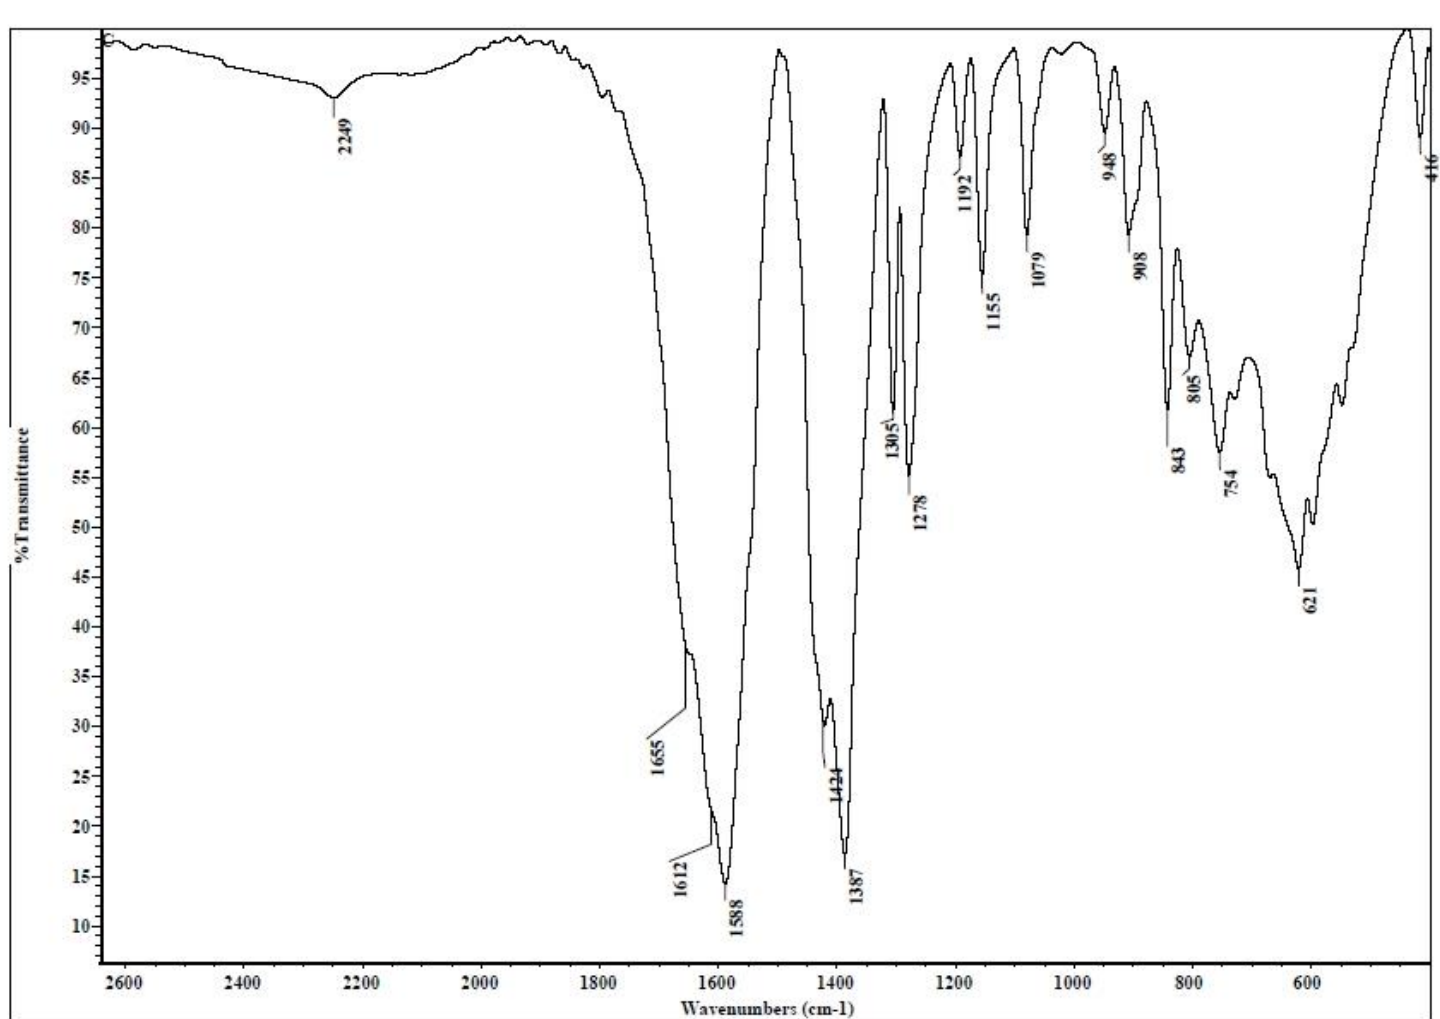

**Supplementary Figure S1.** IR spectrum of chemically synthesized silver nanoparticles.

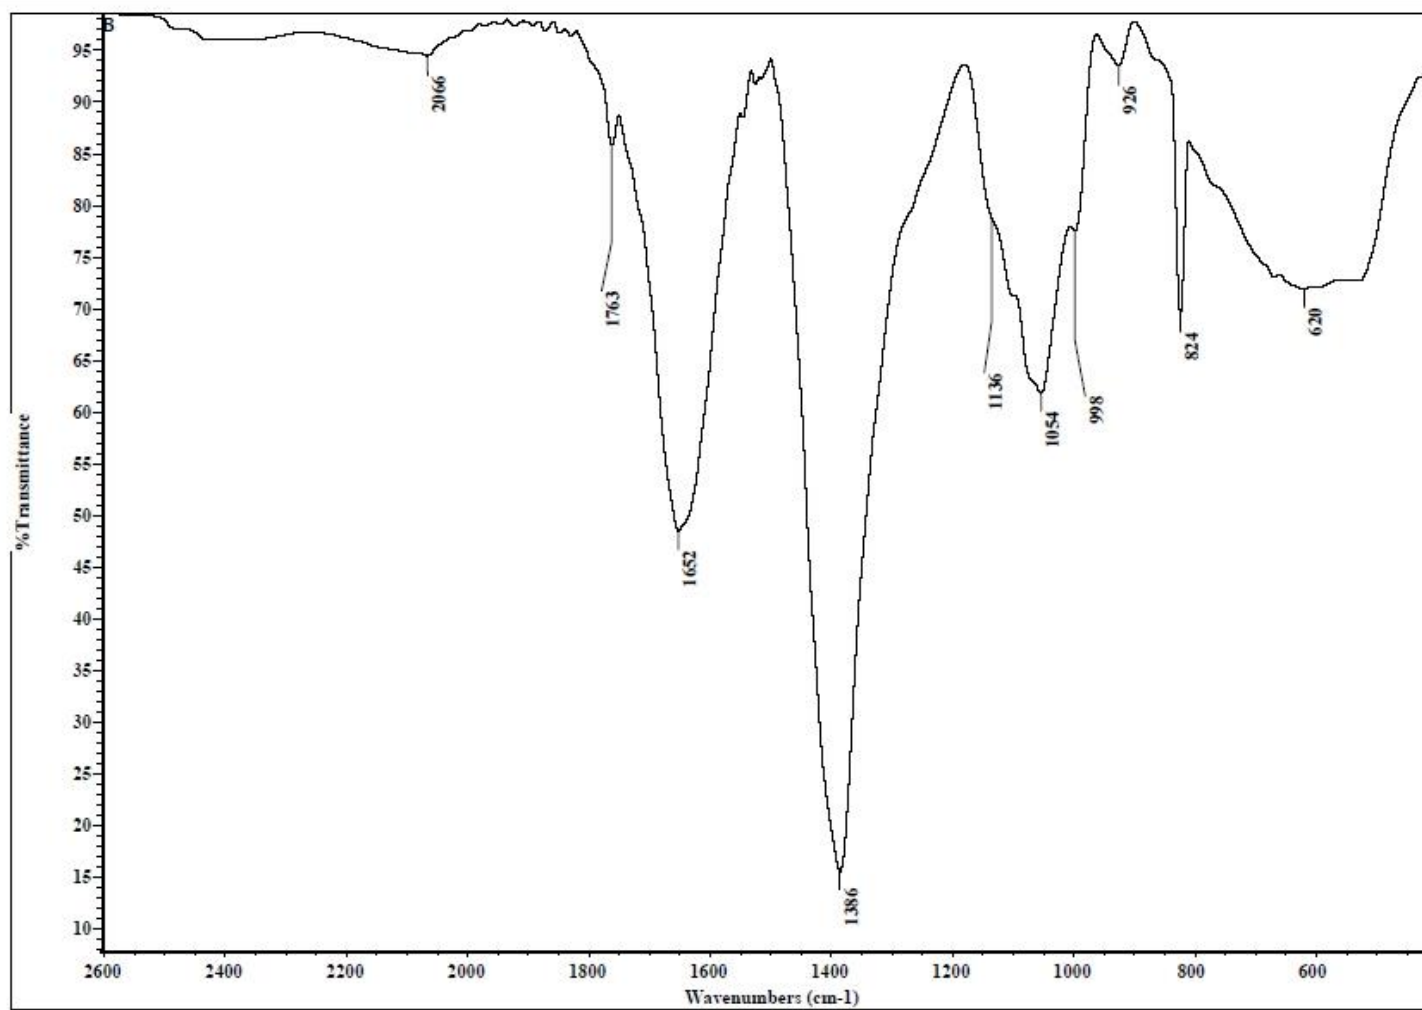

**Supplementary Figure S2.** IR spectrum of biologically synthesized silver nanoparticles.
